# Supplementary material
Source: PubMed Central journal article supplement (PMC6855127)
Supplement: baADV2019000820-suppl1.pdf [file baADV2019000820-suppl1.pdf]

## Supplemental data

### Supplemental Methods

#### Isolation of CD34<sup>+</sup> hematopoietic stem and progenitor cells (HSPCs)

Circulating G-CSF–mobilized human mononuclear cells were obtained from deidentified healthy adult donors (Key Biologics, Lifeblood). Plerixafor-mobilized mononuclear cells were isolated from SCD patients (Uchida et al. manuscript under review). Enrichment of CD34<sup>+</sup> cells was performed by immunomagnetic bead selection using an AutoMACS instrument (Miltenyi Biotec). After enrichment, the CD34<sup>+</sup> cell fraction was 95% of the total, with <0.2% CD3<sup>+</sup> cells and <0.1% CD19<sup>+</sup> cells.

#### Optimization of *HBG1*/*HBG2* promoter editing in human CD34<sup>+</sup> cells via Cas9:sgRNA-1 RNP, using the Neon Transfection System

Purified recombinant Cas9 protein was obtained from Berkeley Macrolabs. Single guide RNAs were synthesized by TriLink BioTechnologies or Synthego. Chemically modified sgRNA included 2'-*O*-methyl 3'-phosphorothioate (MS) modifications at 3 terminal nucleotides at both the 5' and 3' ends.<sup>1</sup> We did not observe clear differences in activity using sgRNAs synthesized by the two manufacturers. Ribonucleoprotein complexes (RNPs) were formed by incubating different amounts of Cas9 (6.4 to 128 pmol) with sgRNA-1 (supplemental Table 3) (12.8 to 256 pmol) in 5 µL of 10 mM HEPES (Thermo Fisher Scientific, catalog # 15630080), 150 mM NaCl (Thermo Fisher Scientific, catalog # 9759).

Cryopreserved CD34<sup>+</sup> cells were thawed and prestimulated for 48 h in maintenance medium (see supplemental Table 2). The cells were then washed, resuspended in T buffer (Thermo Fisher Scientific), mixed with RNP (described below), and electroporated with 1600 V, 3 pulses of 10 ms, using a Neon Transfection System (Thermo Fisher Scientific, catalog # MPK5000). Cells were grown in culture in StemSpan™ SFEM with SCF, Flt-3l, and TPO for 4 days before the indel frequency was measured. As controls, cells were either electroporated with Cas9 alone or not electroporated.

For pilot experiments to optimize genome-editing activity,  $2 \times 10^5$  CD34<sup>+</sup> cells were mixed with 6.4 to 128 pmol of RNP (as pmol of Cas9) in a volume of 10 µL before electroporation. For *in vitro* erythroid differentiation studies,  $2 \times 10^5$  CD34<sup>+</sup> cells were mixed with 32 pmol of RNP (as pmol Cas9) in a volume of 10 µL. For xenotransplantation studies,  $5 \times 10^6$  CD34<sup>+</sup> cells were mixed with 800 pmol of RNP (as pmol Cas9) in a volume of 100 µL or scaled at the same ratios.

#### Measurements of on-target indel frequencies

After editing, *HBG2* and *HBG1* promoter regions surrounding the on-target BCL11A binding site were amplified with oligonucleotide primers If1 and Ir1 to generate 322-nt and 318-nt PCR products for *HBG1* and *HBG2* respectively, then analyzed by next-generation sequencing (NGS) (see main Figure 4A and supplemental Table 3).

Two methods were used to approximate larger deletions consistent with the loss of a 4.9-kb *HBG1*-*HBG2* intergenic fragment that could arise after simultaneous on-target editing of both gene promoters (see main Figure 4A). **First**, the oligonucleotide primers ΔHBG2.F and ΔHBG2.R were used to amplify exon 3 of both *HBG1* and *HBG2* to generate gene-specific amplicons that differ by 1 nucleotide at cDNA position 410 (G or C at *HBG2* and *HBG1*, respectively) and analyzed by targeted next generation sequence, with reduced G reads in the common amplicon reflecting the deletion of *HBG2* exon 3. **Second**, we used a TaqMan primer (Del.p) and probe sets (Del.f-Del.r) (Thermo Fisher Scientific) to detect the loss of a sequence from 481 to 683 upstream of the Cas9/sg-

RNA1 cleavage site in *HBG1* (see main Figure 4A<sup>2</sup>). Quantitative PCR was performed on genomic DNA from gene-edited cells, and the results were compared to those obtained with control HUDEP-2 clones containing 0, 1, or 2 4.9-kb-deleted alleles.  $\Delta\Delta C_T$  values were determined using amplification of the RNaseP gene (*RPPHI*) as a copy-number reference. Inversions of the 4.9-kb *HBG1-HBG2* intervening sequence were detected by PCR amplification of edited genomic DNA, using the primers HBG2.inv.F and HBG2.inv.R (main Figure 4D). The amplicons were fractionated by agarose gel electrophoresis and analyzed by NGS.

Libraries for NGS were made using a 2-step PCR protocol, in which the target genomic site of interest was amplified first with primers containing partial Illumina sequencing adaptors (step 1) and then with primers containing indices and the remaining necessary Illumina sequencing adapters (step 2). Briefly, target regions were amplified with locus-specific primers (If and Ir) containing universal 5' tails. PCR amplifications were performed with MyTaq 2× Master Mix (Bioline, catalog # BIO-25041), CloneAmp™ HiFi PCR Premix (Takara, catalog # 639298), or Platinum SuperFi PCR master mix (Thermo Fisher Scientific, catalog # 12358250) according to the manufacturer's protocol. The step 1 PCR product was indexed by using 0.1× the volume from step 1 with indexing primers (P5-dual-index.F and P7-dual-index.R). Melting at 94°C for 2 min was followed by 5 cycles of 94°C for 30 s, 54°C for 30 s, and 72°C for 40 s. The Illumina MiSeq platform was used to generate 2 × 250 paired-end sequencing reads at the Hartwell Sequencing Center (at St. Jude). Sequences were analyzed by joining paired reads and analyzing amplicons for indels or the desired test sequence using *CRIS.py*<sup>3</sup>. Indels were reported as the number of reads without the WT amplicon length.

### **Karyotyping and fluorescence *in situ* hybridization (FISH)**

Human CD235a<sup>-</sup> cells from mouse bone marrow at 17 weeks after xenotransplantation were grown in culture in StemSpan SFEM (100 ng/mL hSCF, Flt3-L, and TPO) with colcemid (20 ng/mL) for 4 h then analyzed by G-banding and fluorescence *in situ* hybridization (FISH). For G-banding, cells were air dried on slides with trypsin and Wright's stain, using standard cytogenetic methods. Twenty metaphase cells were characterized per treatment condition. For metaphase FISH, two bacterial artificial chromosomes (BACs) were used to detect the deletion or translocation of chromosome arm 11p (the *HBB* locus). The probe telomeric to *HBB* (11p15) was labeled with red-dUTP (Alexa Fluor 594; Molecular Probes), and a probe centromeric to *HBB* (11q13) was labeled with green-dUTP (Alexa Fluor 488; Molecular Probes) by nick translation. Both labeled probes were combined with sheared human DNA and hybridized to metaphase cells derived from each sample, using routine cytogenetic methods in a solution containing 50% formamide, 10% dextran sulfate, and 2× saline-sodium citrate (SCC; Fisher Scientific). The cells were then stained with 4,6-diamidino-2-phenylindole (DAPI) and analyzed. FISH for deletion of *HBG2* was performed as described previously.<sup>2</sup> In brief, a 5.2-kb probe encompassing the region between the sgRNA-1 cleavage sites in *HBG2* and *HBG1* was generated by PCR amplification and cloned using TA vector (Promega). Nick translation was used to label purified DNA with red-dUTP (Alexa Fluor 594; Molecular Probes) and to label a control *HBB* probe (RP11-1205H24) independently with green-dUTP (Alexa Fluor 488, Molecular Probes). The probes were hybridized simultaneously with interphase and metaphase cells in 50% formamide, 10% dextran sulfate, and 2× SCC. Metaphase cells were stained with DAPI and scored for signals representing the potentially deleted region (red) and *HBB* (green).

### **Erythroid cell culture**

Erythroid differentiation of CD34<sup>+</sup> cells was performed using a 3-phase protocol<sup>4</sup> (and supplementary Table 2). Phase 1 (days 1–7): IMDM with 2% human blood type AB plasma, 3% human AB serum, 1% penicillin/streptomycin, 3 units/mL heparin, 10 µg/mL insulin, 3 units/mL EPO, 200 µg/mL holo-transferrin, 10 ng/mL SCF, and 1 ng/mL interleukin IL-3. Phase 2 (days 8–14): Phase 1 medium without IL-3. Phase 3 (days 15–21): The holo-transferrin concentration was increased to 1 mg/mL, and SCF was withdrawn.

Erythroblast maturation was monitored by immuno-flow cytometry for the cell surface markers CD235a, CD49d, CD71, and Band3 (supplemental Table 1). To quantify erythroblast enucleation,  $1.5\text{--}4 \times 10^5$  CD34<sup>+</sup>-derived erythroid cells were incubated with Hoechst 33342 for 20 min at 37°C, fixed with 0.05% glutaraldehyde, and permeabilized with 0.1% Triton X-100. Cells were stained with FITC mouse anti-human CD235a and anti-human HbF-APC then analyzed by flow cytometry.

To assess morphology,  $1.5 \times 10^5$  cells were deposited on glass slides by centrifugation at 250 rpm for 5 min, using a Cytospin™ 4 cytocentrifuge (Thermo Scientific). The cells were stained for 2 min with May-Grünwald solution (Sigma, catalog # MG1L-1L), rinsed in water, stained for 10 min with Giemsa solution (Sigma, catalog # GS500-500mL, diluted 20×), rinsed in water, and air dried, then Cytoseal™ 60 mountant (Thermo Scientific, catalog # 8310-4) was applied before the slides were examined microscopically.

To analyze erythroid BFU-E progenitors, 500 CD34<sup>+</sup> cells in 1.0 mL of MethoCult™ H4230 methylcellulose (Stemcell Technologies, catalog # 04230) with 2 U/mL EPO (EPOGEN®, Amgen), 10 ng/mL SCF (R&D Systems, catalog # 255-SC), and 1 ng/mL IL-3 (R&D Systems, catalog # 203-IL) were incubated in 35-mm tissue culture dishes. After 14 days, single colonies were enumerated, then they were lysed in hemolysate reagent (Helena Laboratories, catalog # 5125) for high-performance liquid chromatography (HPLC) and DNA-sequencing analyses to quantify indels.

### HbF quantification

High performance liquid chromatography (HPLC) quantification of hemoglobin tetramers and individual globin chains was performed using ion-exchange and reverse-phase columns on a Prominence HPLC System (Shimadzu Corporation). Proteins eluted from the column were identified at 220 and 415 nm with a diode array detector. The relative amounts of hemoglobins or individual globin chains were calculated from the area under the 415-nm peak and normalized based on the DMSO control. % HbF = [HbF/(HbA + HbF)] × 100; % γ-globin = [(Gγ-chain + Aγ-chain)/β-like chains (β + Gγ + Aγ)] × 100.

### In vitro sickling assay

Magnetic-Activated Cell Sorting (MACS®, Miltenyi Biotec)-purified human SCD CD235a<sup>+</sup> erythroid cells ( $1.0 \times 10^5$  cells) from mouse bone marrow 16–18 weeks after transplantation were grown in culture in phase 3 ED medium under hypoxic conditions (2% O<sub>2</sub>) for 48 h. The IncuCyte® S3 Live-Cell Analysis System (Sartorius) with a 20× objective was used to monitor cell sickling, with images being captured every 2 h. The percentage of sickling was measured by manual counting of sickled cells versus normal cells based on morphology and was performed in a double-blinded manner by 2 observers.

### Xenotransplantation of gene-edited CD34<sup>+</sup> HSPCs into NOD.Cg-Kit<sup>W-41J</sup> Tyr<sup>+</sup> Prkdc<sup>scid</sup> Il2rg<sup>tm1Wjl</sup>/ThomJ (NBSGW) mice

NBSGW mice were purchased from The Jackson Laboratory (stock no. 026622). Gene-edited or control CD34<sup>+</sup> cells were administered at a dose of  $1 \times 10^6$  per mouse by tail-vein injection in female mice aged 8–12 weeks. Chimerism post-transplantation was evaluated at 6, 11, and 16 weeks in the periphery (see supplemental Table 1, Panel 1 [Peripheral blood]) and at 17 weeks in the bone marrow at the time of euthanasia (see supplemental Table 1, Panel 1 [Bone marrow]). Cell lineage composition was determined in the bone marrow by using human-specific antibodies (see supplemental Table 1, Panel 1 [Bone marrow]), and lineages were sorted using a FACS Aria III cell sorter (BD Biosciences). CD34<sup>+</sup> HSPCs or CD235a<sup>+</sup> erythroblasts were isolated with magnetic beads, using the human-specific CD34 MicroBead Kit UltraPure, human, (Miltenyi Biotec Inc., catalog # 130-100-453) and CD235a (glycophorin A) MicroBeads, human, (Miltenyi Biotec Inc., catalog # 130-050-501)].

**Analysis of off-target mutations**

CIRCLE-seq was performed on genomic DNA as previously described.<sup>4,5</sup> The top 26 off-target sequences predicted by CIRCLE-seq were selected for analysis in gene-edited cells. A primer set was developed for each off-target sequence by using Primer3<sup>6</sup> (supplemental Table 3), and amplicons were generated from edited or control DNA for high-throughput sequencing on a MiSeq instrument. On average, the amplicons were sequenced to a depth of approximately 100,000 paired-end reads.

**Editing of CD34<sup>+</sup> HSPCs with the Lonza 4D-Nucleofector™ system (performed at St. Jude Children's Research Hospital) (Figure 7A)**

Cas9-2xNLS was purified in 20 mM HEPES, 5% glycerol, 150 mM KCl, and 1 mM TCEP, pH 7.5. Cas9-3xNLS protein was purified in 50 mM HEPES, 5% glycerol, 150 mM KCl, and 1 mM TCEP, pH 7.5. Both proteins were purified in the St. Jude protein core facility.

CD34<sup>+</sup> HSPCs were thawed in Iscove Modified Dulbecco Medium (IMDM) (Gibco, catalog # 12440053) and pre-stimulated for 48 h in StemSpan SFEM II (Stem Cell Technologies, catalog # 9655) with 100 ng/mL human SCF, 100 ng/mL human thrombopoietin (TPO), 100 ng/mL recombinant human Flt3-ligand (Flt3-L), and 1% penicillin/streptomycin (Fisher, catalog # 1507063).

Cas9-NLS variants (50 pmol) were mixed with sgRNA (150 pmol, synthesized by Synthego) at a 1:3 molar ratio for RNP complexation and incubated for 15 min at room temperature (RT). Then,  $2 \times 10^5$  cells were resuspended in P3 solution (20  $\mu$ L) mixed with RNPs (5  $\mu$ L) and 20  $\mu$ L was transferred to a nucleofection strip (Lonza, catalog # V4SP-3096). Electroporation was performed using a Lonza 4D-Nucleofector™ according to the manufacturer's instructions, with different pulse codes (DN-100, DS-130, DS-150, and EO-100). Electroporated cells were recovered with SFEM II medium including cytokines. Genomic DNA was extracted on culture day 3 by using Agencourt DNAdvance (Beckman Coulter, catalog # A48705) then analyzed by NGS for indels.

NGS libraries were prepared with a 2-step PCR protocol. In the first step, the targeted genomic site was amplified by PCR with Phusion Hot Start Flex 2X Master Mix (New England BioLabs, catalog # M0536L) and primers with partial Illumina sequencing adaptors (If2 and Ir2) (supplemental Table 3). Amplification conditions were as follows: 98°C for 3 min, followed by 35 cycles of 98°C for 10 s, 60°C for 10 s, 72°C for 7 s, and 72°C for 3 min. In the second step, PCR was performed with a KAPA HiFi HotStart ReadyMix PCR Kit (Roche, KK2602) to add Illumina sequencing adaptors (P5-dual-index and P7-dual-index) to the purified PCR product of the first step. Amplification conditions were as follows: 98°C for 45 s, followed by 10 cycles of 98°C for 15 s, 65°C for 30 s, 72°C for 30 s, and 72°C for 1 min. The Illumina MiSeq platform was used to generate FASTQ sequences with 150-bp paired-end reads, and these were analyzed by joining paired reads and analyzing amplicons, using *CRISPResso* for indel measurement.<sup>7</sup>

**Editing of CD34<sup>+</sup> HSPCs with the Lonza 4D-Nucleofector™ and xenotransplantation (performed at Boston Children's Hospital) (Figure 7B-F)**

Cas9-3xNLS was purified and reconstituted in 20 mM HEPES, 150 mM NaCl, pH 7.4. The modified synthetic sgRNA (2'-O-methyl 3' phosphorothioate modifications in the first and last 3 nucleotides) was obtained from Synthego. The sgRNA concentration was calculated based on the full-length product reporting method. For RNP complexation, Cas9 (500 pmol) was mixed with sgRNA at a 1:3 molar ratio and incubated for 15 min at RT. A 30% glycerol solution (7.9  $\mu$ L) was added to the Cas9 protein before sgRNA addition to obtain a final concentration of 2% glycerol in the RNP mix.

CD34<sup>+</sup> HSPCs were thawed and grown in culture for 24 h in X-VIVO 15 medium (Lonza, catalog # 04-418Q) supplemented with the human cytokines stem cell factor (SCF), thrombopoietin (TPO), and Flt3-L. For

xenotransplantation, 4 million cells were resuspended in 100  $\mu$ L of P3 solution and mixed with RNPs. CD34<sup>+</sup> cells were transferred to 100- $\mu$ L nucleofection cuvettes (Lonza, catalog # V4XP-3024) and electroporated with a Lonza 4D-Nucleofector™ using the EO-100 program in accordance with the manufacturer's recommendation. Edited cells were recovered and grown in culture in X-VIVO medium supplemented with cytokines. Twenty-four hours after electroporation, the cells were transferred to erythroid differentiation medium and were harvested on day 5. Genomic DNA was extracted using a Qiagen Blood and Tissue kit. PCR was performed with KOD Hot Start DNA Polymerase with TIDE.F and TIDE.R primers (supplemental Table 3). Amplification conditions were as follows: 95°C for 3 min; then 35 cycles of 95°C for 20 s, 60°C for 10 s, and 70°C for 10 s; followed by 70°C for 5 min. PCR products were Sanger-sequenced and analyzed for indels by using the TIDE algorithm with a 40-bp decomposition window<sup>8</sup>, comparing genomic DNA from edited to unedited cells.

Gene-edited or control human CD34<sup>+</sup> donor cells were transplanted by retro-orbital injection into 4–5-week-old female NBSGW recipients at a dose of  $8 \times 10^5$  cells per mouse. To determine donor chimerism levels and indel frequencies at 16 weeks after xenotransplantation, recipient bone marrow cells were incubated with human lineage-specific antibodies (supplemental Table 1, Panel 2), separated on a FACSAria II cell sorter (BD Biosciences), and analyzed by PCR followed by TIDE-seq.

## Supplemental Tables

Supplemental Table 1. Antibodies used in flow cytometry panels

| <i>Panel</i>                                                                                      | <i>Antibody</i>                                     | <i>Clone</i>                   | <i>Manufacturer</i>   | <i>Catalog #</i> |            |
|---------------------------------------------------------------------------------------------------|-----------------------------------------------------|--------------------------------|-----------------------|------------------|------------|
| <i>Erythropoiesis and fetal hemoglobin expression</i>                                             | FITC Mouse Anti-Human CD235a                        | GA-R2 (HIR2) (RUO)             | BD Pharmingen™        | 559943           |            |
|                                                                                                   | Hoechst 33342                                       | Stock 10 mM = 2000×            | Millipore Sigma       | B2261            |            |
|                                                                                                   | PE Anti-Human CD49d                                 | 9F10                           | BioLegend             | 304304           |            |
|                                                                                                   | PE/Cy7 Anti-Human CD71                              | CY1G4                          | BioLegend             | 334112           |            |
|                                                                                                   | APC Anti-Human Band3                                |                                | New York Blood Center | Gift from X. An  |            |
|                                                                                                   | Anti-Fetal Hemoglobin-APC, human                    | REA533                         | Miltenyi Biotec       | 130-108-243      |            |
| <i>Chimerism after xenotransplantation Panel 1 (Peripheral blood)</i><br><br><i>(Bone marrow)</i> | FITC Mouse Anti-Human CD45                          | HI30 (RUO)                     | BD Pharmingen™        | 555482           |            |
|                                                                                                   | APC-Cy™7 Rat Anti-Mouse CD45                        | 30-F11 (RUO)                   | BD Pharmingen™        | 557659           |            |
|                                                                                                   | BV786 Rat Anti-Mouse CD45                           | 30-F11 (RUO)                   | BD Horizon™           | 564225           |            |
|                                                                                                   | PerCP-Cy™5.5 Rat Anti-Mouse TER-119/Erythroid Cells | TER-119 (RUO)                  | BD Pharmingen™        | 560512           |            |
|                                                                                                   | BV605 Mouse Anti-Human CD45                         | HI30 (RUO)                     | BD Horizon™           | 564047           |            |
|                                                                                                   | PE-Cy™7 Mouse Anti-Human CD33                       | P67.6 (RUO (GMP))              | BD Biosciences        | 333946           |            |
|                                                                                                   | APC-Cy™7 Mouse Anti-Human CD3                       | SK7 (Leu-4) (RUO)              | BD Pharmingen™        | 557832           |            |
|                                                                                                   | CD19 (Leu™-12) PE                                   | 4G7 (IVD)                      | BD Biosciences        | 349209           |            |
|                                                                                                   | CD34 FITC                                           | 8G12 (HPCA2) (ASR)             | BD Biosciences        | 340668           |            |
|                                                                                                   | APC Mouse Anti-Human CD235a                         | GA-R2 (HIR2) (RUO)             | BD Pharmingen™        | 551336           |            |
|                                                                                                   | DAPI                                                |                                |                       |                  |            |
|                                                                                                   | <i>Chimerism after xenotransplantation Panel 2</i>  | Human TruStain FcX             |                       | BioLegend        | 422302     |
|                                                                                                   |                                                     | TruStain fcX                   | 93                    | BioLegend        | 101320     |
|                                                                                                   |                                                     | V450 Mouse Anti-Human CD45     | HI30                  | BD Biosciences   | 560367     |
|                                                                                                   |                                                     | PE-eFluor 610 mCD45 Monoclonal | 30-F11                | Thermo Fisher    | 61-0451-82 |
| FITC Anti-Human CD235a                                                                            |                                                     | HI264                          | BioLegend             | 349104           |            |
| PE Anti-Human CD33                                                                                |                                                     | P67.6                          | BioLegend             | 366608           |            |
| APC Anti-Human CD19                                                                               |                                                     | HIB19                          | BioLegend             | 302212           |            |
| Fixable Viability Dye eFluor 780                                                                  |                                                     |                                | Thermo Fisher         | 65-0865-14       |            |

Supplemental Table 2. Media and cytokines

| <i>Medium</i>                                        | <i>Component</i>                               | <i>Manufacturer</i>      | <i>Catalog #</i>                        | <i>Final Concentration</i>                    |
|------------------------------------------------------|------------------------------------------------|--------------------------|-----------------------------------------|-----------------------------------------------|
| <i>CD34<sup>+</sup><br/>maintenance</i>              | StemSpan™ SFEM (base)                          | Stemcell Technologies    | 09650                                   |                                               |
|                                                      | Human Stem Cell Factor (hSCF)                  | R&D systems              | rhSCF, 255-SC/CF                        | 100 ng/mL                                     |
|                                                      | Thrombopoietin (TPO)                           | R&D systems              | rhTPO # 288-TP/CF                       | 100 ng/mL                                     |
|                                                      | FLT3-Ligand (FLT3-L)                           | R&D systems              | rhFlt-3 # 3088-FK/CF)                   | 100 ng/mL                                     |
|                                                      | Penicillin-Streptomycin                        | Thermo Fisher Scientific | 15070063                                | Penicillin: 50 U/mL<br>Streptomycin: 50 µg/mL |
| <i>Erythroid<br/>differentiation</i>                 | <i>Common to all phases:</i>                   |                          |                                         |                                               |
|                                                      | IMDM (base)                                    | Thermo Fisher Scientific | 12440061                                |                                               |
|                                                      | Human Male AB Plasma                           | SeraCare                 | 1810-0001                               | 2%                                            |
|                                                      | Human AB Serum                                 | Atlanta Biologicals      | S40110                                  | 3%                                            |
|                                                      | Heparin                                        | Sagent Pharmaceuticals   | NDC # 25021-401-02                      | 3 UI/mL                                       |
|                                                      | Insulin                                        | Lilly                    | Humulin® R U-100,<br>NDC # 0002-8215-17 | 10 µg/mL                                      |
|                                                      | EPO                                            | Amgen                    | EPOGEN®, NDC #<br>55513-144-01          | 3 UI/mL                                       |
|                                                      | Penicillin-Streptomycin                        | Thermo Fisher Scientific | 15070063                                | Penicillin 50 U/mL<br>Streptomycin 50 µg/mL   |
| <i>Erythroid<br/>differentiation<br/>(phase I)</i>   | <i>Add the following to common components:</i> |                          |                                         |                                               |
|                                                      | Human Holo-Transferrin                         | Millipore Sigma          | T0665                                   | 200 µg/mL                                     |
|                                                      | Human Stem Cell Factor (hSCF)                  | R&D systems              | rhSCF, 255-SC/CF                        | 10 ng/mL                                      |
|                                                      | Human IL-3                                     | R&D systems              | rhIL-3, 203-IL/CF                       | 1 ng/mL                                       |
| <i>Erythroid<br/>Differentiation<br/>(phase II)</i>  | <i>Add the following to common components:</i> |                          |                                         |                                               |
|                                                      | Human Holo-Transferrin                         | Millipore Sigma          | T0665                                   | 200 µg/mL                                     |
|                                                      | Human Stem Cell Factor (hSCF)                  | R&D systems              | rhSCF, 255-SC/CF                        | 10 ng/mL                                      |
| <i>Erythroid<br/>differentiation<br/>(phase III)</i> | <i>Add the following to common components:</i> |                          |                                         |                                               |
|                                                      | Human Holo-Transferrin                         | Millipore Sigma          | T0665                                   | 1 mg/mL                                       |

Supplemental Table 3. Nucleic sequences of guide RNA and primers

| Assay                              | Name                                                                         | Sequence (5' to 3')                                                                                                                                                                                                                                        |
|------------------------------------|------------------------------------------------------------------------------|------------------------------------------------------------------------------------------------------------------------------------------------------------------------------------------------------------------------------------------------------------|
| Single guide RNA                   |                                                                              | <i>Underlined sequence corresponds to target</i>                                                                                                                                                                                                           |
|                                    | sgRNA-1                                                                      | G* <u>C</u> *U*UGUCAAGGCUAUUGGUCAGUUUUAGAGCUAGAAAUAGCAAG<br>UAAAAUAAGGCUAGUCCGUUAUCAACUUGAAAAAGUGGCACCGAG<br>UCGGUGCU*U*U*U                                                                                                                                |
|                                    |                                                                              | * 2'-O-methyl modification and phosphorothioate internucleotide linkage.                                                                                                                                                                                   |
|                                    |                                                                              | <i>Chemically modified versions of sgRNA-1 contained 2'-O-methyl modifications and phosphorothioate linkages in the first and last 3 nucleotides. gRNAs synthesized by Trilink contain an additional 5' G, while gRNAs synthesized by Synthego do not.</i> |
| Indels by NGS at HBG2/I CCAAT box  |                                                                              | <i>Underlined sequences correspond to universal 5' tails</i>                                                                                                                                                                                               |
|                                    | If1                                                                          | <u>CACTCTTCCCTACACGACGCTCTTCCGATCT</u> ACTGAATCGGAACAAGG<br>CAAAGGCT                                                                                                                                                                                       |
|                                    | Ir1                                                                          | <u>GTGACTGGAGTTCAGACGTGTGCTCTTCCGATCT</u> ACCCATGGCGTCTGG<br>ACTAGGAGCT                                                                                                                                                                                    |
|                                    | If2                                                                          | <u>CACTCTTCCCTACACGACGCTCTTCCGATCT</u> TGACTGAATCGGAACAA<br>GGCAAAGG                                                                                                                                                                                       |
|                                    | Ir2                                                                          | <u>GTGACTGGAGTTCAGACGTGTGCTCTTCCGATCT</u> TATTCTTCATCCCTAG<br>CCAGCCGC                                                                                                                                                                                     |
|                                    |                                                                              | <i>Underlined sequences correspond to bar coding</i>                                                                                                                                                                                                       |
|                                    | P5-dual-index                                                                | AATGATACGGCGACCACCGAGATCTACAC <u>NNNNNNNN</u> NACACTCTTTCC<br>CTACACGACGCTCTTC                                                                                                                                                                             |
|                                    | P7-dual-index                                                                | CAAGCAGAAGACGGCATAACGAGAT <u>NNNNNNNN</u> NGTGACTGGAGTTCAG<br>ACGTGTGCTC                                                                                                                                                                                   |
| P5-dual-index.F                    | AATGATACGGCGACCACCGAGATCTACAC <u>NNNNNN</u> NACACTCTTTCCCT<br>ACACGACGCTCTTC |                                                                                                                                                                                                                                                            |
| P7-dual-index.R                    | CAAGCAGAAGACGGCATAACGAGAT <u>NNNNNNNN</u> NGTGACTGGAGTTCAGA<br>CGTGTGCTC     |                                                                                                                                                                                                                                                            |
| Indels by TIDE at HBG2/I CCAAT box | TIDE.F                                                                       | GCCTACCTCCCAGGGTTTC                                                                                                                                                                                                                                        |
|                                    | TIDE.R                                                                       | TGATGGGAGAAGGAACTAGC                                                                                                                                                                                                                                       |
|                                    |                                                                              |                                                                                                                                                                                                                                                            |
| Deletion of HBG2 by NGS            |                                                                              | <i>Underlined sequences correspond to universal 5' tails</i>                                                                                                                                                                                               |
|                                    | ΔHBG2.F                                                                      | <u>CACTCTTCCCTACACGACGCTCTTCCGATCT</u> GGTGGAAAGCTTGGTGTG<br>TAG                                                                                                                                                                                           |



|                                          |                                               |                                                                      |
|------------------------------------------|-----------------------------------------------|----------------------------------------------------------------------|
|                                          | $\Delta$ HBG2.R                               | <u>GTGACTGGAGTTCAGACGTGTGCTCTTCCGATCTAAAGCCTATCCTTGA</u><br>AAGCTCTG |
| <i>Deletions of<br/>HBG2 by<br/>qPCR</i> | Del.F                                         | ACGGATAAGTAGATATTGAGGTAAGC                                           |
|                                          | Del.R                                         | GTCTCTTTCAGTTAGCAGTGG                                                |
|                                          | Del.P                                         | ACTGCGCTGAAACTGTGGTCTTTATGA                                          |
|                                          | TaqMan™<br>RNase P<br>Control<br>Reagents Kit | Thermo Fisher Scientific, catalog # 4316844                          |
|                                          |                                               |                                                                      |
| <i>Inversions of<br/>HBG2 by<br/>PCR</i> | HBG2.inv.F                                    | CTGTTTCTGAGGAGTCCTGTCCTA                                             |
|                                          | HBG2.inv.R                                    | GGCGTCTGGACTAGGAGCTTATTG                                             |
|                                          |                                               |                                                                      |
| <i>Off-target<br/>validation</i>         | ON-T.F                                        | ACTGAATCGGAACAAGGCAAAGGCT                                            |
|                                          | ON-T.R                                        | ATAACCTCAGACGTTCCAGAAGCGAGTGTG                                       |
|                                          | OT-1.F                                        | TGGAGGTTCTTGAATGAGGCCTGA                                             |
|                                          | OT-1.R                                        | AGAAATCTTGATGCACAGAGGGCT                                             |
|                                          | OT-2.F                                        | ATTTTATCCAGCTTGGCAGGGGC                                              |
|                                          | OT-2.R                                        | CACCCCCAACCCCTTCACATGT                                               |
|                                          | OT-3.F                                        | GCCTCCAGAAGAAATGACAAAAGGC                                            |
|                                          | OT-3.R                                        | CCTCCCTGGTTCACGCCA                                                   |
|                                          | OT-4.F                                        | GGATGTAGTCCCACTTGTTTATTTTGT                                          |
|                                          | OT-4.R                                        | AATTGGCCCTTTATCTGACACCA                                              |
|                                          | OT-5.F                                        | ACTCACTGTAGGAGCTTGGAGAAGT                                            |
|                                          | OT-5.R                                        | GGTGCTAAGTGGCAAAGCTGAGG                                              |
|                                          | OT-6.F                                        | GCCCACCTGTAACGAAATAGAAGAGGG                                          |
|                                          | OT-6.R                                        | TTTCCACGGCCACATCACACA                                                |
|                                          | OT-7.F                                        | GCAGGGGAAGCTGTCTCAAAGC                                               |
| OT-7.R                                   | TGTGCTTGCTGGTAAGAAACATCT                      |                                                                      |
| OT-8.F                                   | TTTAGTGCTTGCCCCCTGCTCT                        |                                                                      |
| OT-8.R                                   | ACAGCAAGGCTACTGCGTCCAC                        |                                                                      |
| OT-9.F                                   | AGGGAACATCATGGTCTATCAGACACA                   |                                                                      |
| OT-9.R                                   | TCAGGACTTCAGCCTCCCCATCT                       |                                                                      |
| OT-10.F                                  | AGGATGAGGGACAGAAAACATTGCTG                    |                                                                      |
| OT-10.R                                  | TTGGGGGAGTGACTTGTGCCAG                        |                                                                      |
| OT-11.F                                  | CCTGAAGCAAAGGAATACTGGGCCT                     |                                                                      |
| OT-11.R                                  | GGTCATCAGAGGCACTGGGGGA                        |                                                                      |
| OT-12.F                                  | GCTGCACTTTTTGAAGGCAAAGTCC                     |                                                                      |
| OT-12.R                                  | GGGGAACAGGGTTAGAAAAGTCAACA                    |                                                                      |
| OT-13.F                                  | AAATTTGTGTTTGGGTGTGCATGCC                     |                                                                      |
| OT-13.R                                  | AGCTGGCAGTGAGCTGTTCCAG                        |                                                                      |
| OT-14.F                                  | TCTATTTTGTCTTTTGTGCTTGTGCT                    |                                                                      |
| OT-14.R                                  | TCAACAAGGGTGCCAAGAGTACACA                     |                                                                      |
| OT-15.F                                  | TCCGAAGACACTTTGTATTCTGGA                      |                                                                      |

|         |                               |
|---------|-------------------------------|
| OT-15.R | TCACCACTTGGGGGTCTCCTGT        |
| OT-16.F | ACCATGCAGCAATGTAGCAGAT        |
| OT-16.R | CGCCCGGCAATACTGGTTCTT         |
| OT-17.F | GTGTCAGCCACTGCATCTGG          |
| OT-17.R | AAGCCCACCGGTTCTGCAC           |
| OT-18.F | TGCTGTGGAGAAGTTTTGCAGT        |
| OT-18.R | GGTGACAGAGCAAGACCCTC          |
| OT-19.F | TGTTTGCTTGGTTGTTACTTTTTCAATT  |
| OT-19.R | ACTACAGCATGATGCCGATGAAC       |
| OT-20.F | ACTTTTGCTTTTGTTCCTGAGC        |
| OT-20.R | AGCCCACTAAGAAAACACAGTGGGG     |
| OT-21.F | GGCCAGGCCTGAAATGGAGTCT        |
| OT-21.R | GCAGCTGCTCTCCTTCCTACTCC       |
| OT-22.F | TCTCTAAATGTTATGCCTCTCCATGAAA  |
| OT-22.R | TTCCATGAGGACATTGAGCATGA       |
| OT-23.F | TGTGTGTGCGTGTGTGTACATT        |
| OT-23.R | TGGCCGGTTAAAAGTACTTTTGCCA     |
| OT-24.F | CCACCACGCCTGACTGTGGATA        |
| OT-24.R | ATTCACACAACATAAGCTAGGAAAATTCT |
| OT-25.F | GGCCAGCTCCCAGTTGTAAGTGT       |
| OT-25.R | CACCCGTCTCAGCCTCCC            |
| OT-26.F | ATGGCCCACTTGTATTCTGCCC        |
| OT-26.R | GGGCATGGACCTCTGAAAATCTGC      |

**Supplemental Table 4. Quantification of on-target mutations by NGS and TaqMan qPCR before and after bone marrow transplantation**

| <i>Donor</i> | <i>Donor type</i> | <i>Pre-BMT</i> |                 |                       | <i>Post-BMT</i> |                      |                       |                        |
|--------------|-------------------|----------------|-----------------|-----------------------|-----------------|----------------------|-----------------------|------------------------|
|              |                   | % Indels (NGS) | TaqMan % (qPCR) | $\Delta$ HBG2 % (NGS) | % Indels (NGS)  | TaqMan % (qPCR)      | $\Delta$ HBG2 % (NGS) | $\Delta$ HBG2 % (FISH) |
| 1            | ND#1              | 73             | 32 (44)         | 36 (49)               | 44 ± 9          | 21 ± 9<br>(50 ± 26)  | 11 ± 13<br>(28 ± 26)  | NTD                    |
| 2            | ND#2              | 76             | 31 (41)         | 23 (30)               | 45 ± 8          | 8 ± 4<br>(18 ± 11)   | 5 ± 2<br>(12 ± 3)     | NTD                    |
| 3            | SCD#1             | 80             | 40 (50)         | 23 (29)               | 72 ± 3          | 33 ± 5<br>(46 ± 5)   | 23 ± 8<br>(33 ± 12)   | 32                     |
| 4            | SCD#2             | 55             | 19 (35)         | 12 (22)               | 18 ± 2          | 15 ± 2<br>(83 ± 13)  | 14 ± 8<br>(78 ± 42)   | NTD                    |
| 5            | ND#1 3xNLS        | 96             | 71 (75)         | NTD                   | 90 ± 2          | 40 ± 6<br>(44 ± 7)   | NTD                   | NTD                    |
| 6            | ND#2 3xNLS        | 94             | 54 (58)         | NTD                   | 96 ± 3          | 22 ± 10<br>(23 ± 10) | NTD                   | NTD                    |

All values are percentages. For TaqMan and NGS, the values in parentheses indicate the percentage of *HBG2* loss normalized to small indels (per 100% small indels).

ND indicates a normal donor, whereas SCD indicates a donor with sickle cell disease. NTD: not determined.

## Supplemental Figures

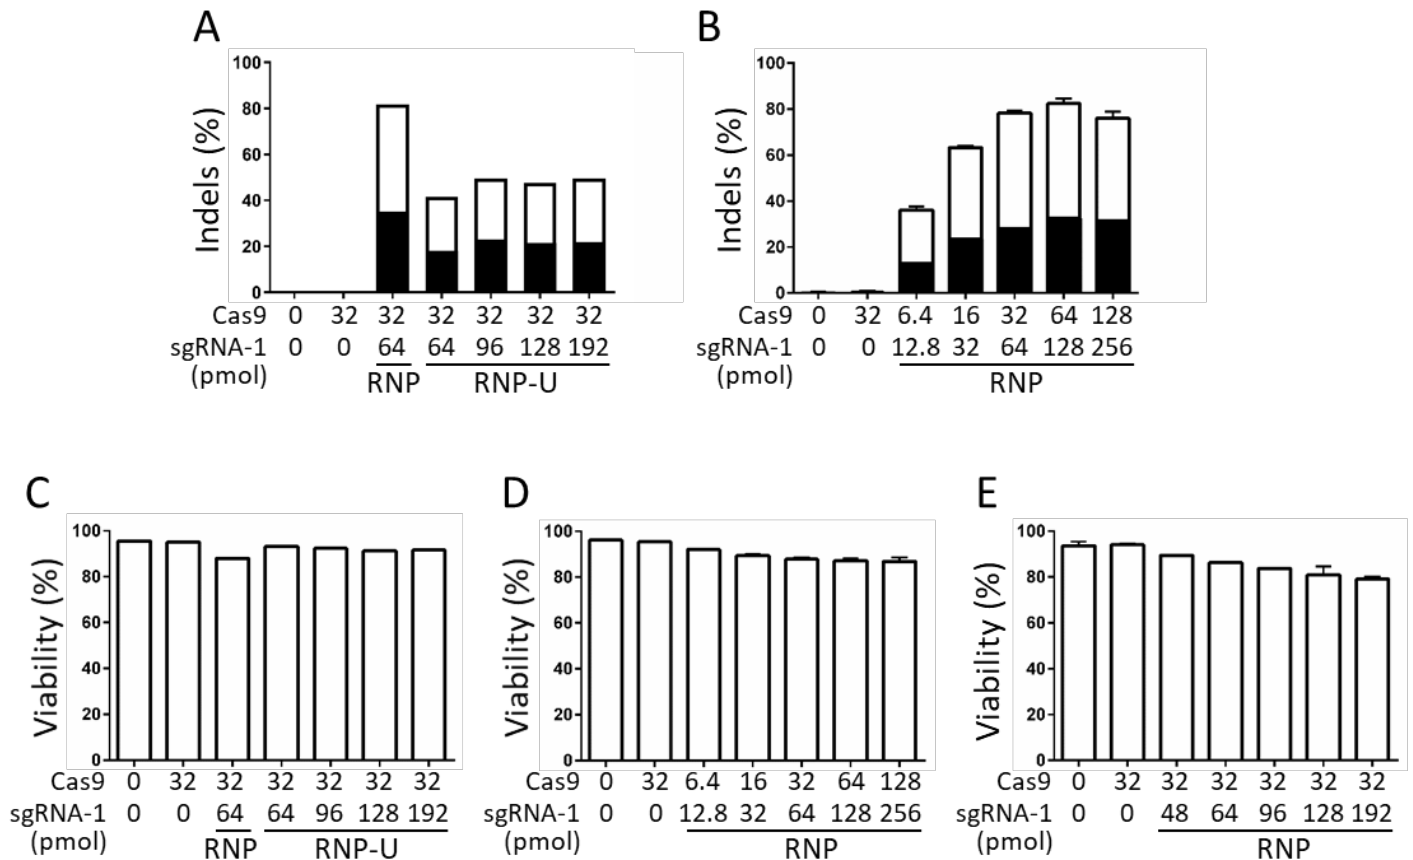**Supplemental Figure 1. Effects of gene editing on CD34<sup>+</sup> cell viability.**

CD34<sup>+</sup> HSPCs were electroporated with Cas9 + sgRNA-1 RNP, using the Neon Transfection System, as described in Figure 1B and the Supplemental Methods. Indel frequency was determined by next-generation sequencing (NGS) after culture for 4 days. **A.** Optimization of the Cas9:unmodified sgRNA ratio for indel formation (n = 2 biological replicates). **B.** Optimization of the ribonucleoprotein (RNP) concentration for indel formation (n = 4 biological replicates with 1 donor). Ribonucleoproteins were generated by incubating the indicated amounts of Cas9 with sgRNA in 5  $\mu$ L of 10 mM HEPES, 150 mM NaCl for 30 min at room temperature. The designation “RNP-U” denotes unmodified sgRNA, whereas “RNP” denotes chemically modified sgRNA, which was used in subsequent studies. For all experiments, RNPs were mixed with  $2 \times 10^5$  CD34<sup>+</sup> cells resuspended in 10  $\mu$ L of T buffer, electroporated at 1600V, with  $3 \times 10$ -ms pulses, incubated in culture for 4 days, then analyzed for indel formation by NGS of PCR products generated using primers located approximately 100 bp to either side of the predicted sgRNA-1 cleavage site (supplemental Table 3). The graphs show the mean  $\pm$  SD indel frequency on the y-axis. The 13-nt HPFH deletion is shown in black. **C, D,** and **E.** Cell viability measured by flow cytometry using DAPI for the cells described in panels A and B of this figure and in main Figure 1B, respectively.

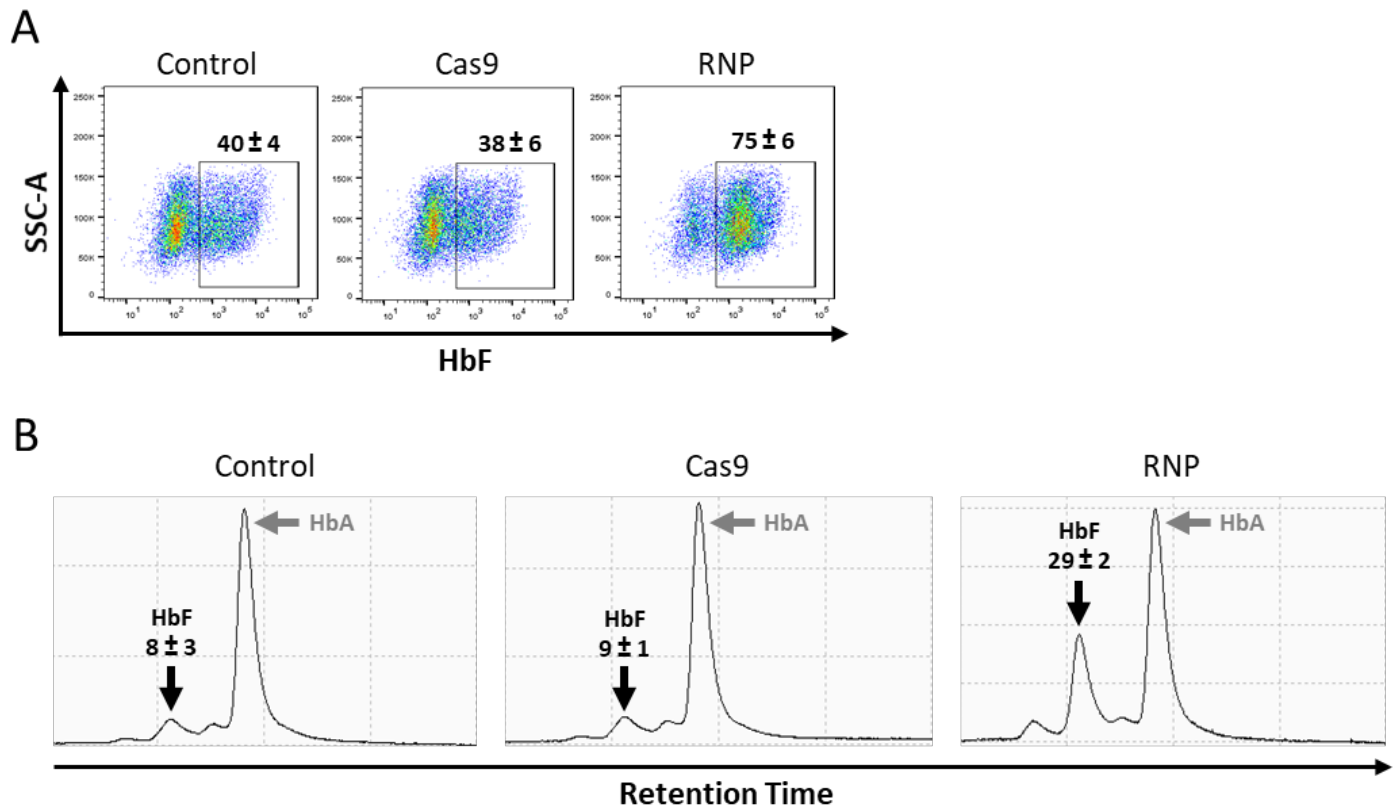

**Supplemental Figure 2. Induction of HbF in erythroid cells derived from gene-edited normal donor CD34<sup>+</sup> cells.**

CD34<sup>+</sup> cells were edited by electroporation of Cas9 + sgRNA-1 RNP, using the Neon Transfection System, then grown in culture under erythroid differentiation conditions for 21 days. **A.** Hemoglobin F (HbF)-immunostaining “F-cells” determined by flow cytometry. **B.** HbF levels determined by isoelectric focusing high-performance liquid chromatography (IE-HPLC). Both panels show representative data as the means  $\pm$  SDs of results from 7 independent experiments using CD34<sup>+</sup> cells from 2 independent donors.

| Reference                | AAACTCCACCCATGGGTTGGCCAGCCTTGCCTTGACCAATAGCCTTGACAAGGCAAACCTTG  |     | % Allele (Read count) |
|--------------------------|-----------------------------------------------------------------|-----|-----------------------|
| Input                    | AAACTCCACCCATGGGTTGGCCAGCCTTGCCTTGACCAATAGCCTTGACAAGGCAAACCTTG  | 0   | 30.2 (302)            |
|                          | AAACTCCACCCATGGGTTGGCCAGCCTT-----GCCTTGACAAGGCAAACCTTG          | Δ13 | 28.8 (288)            |
|                          | AAACTCCACCCATGGGTTGGCCAGCCTTGCCTTGA-CAATAGCCTTGACAAGGCAAACCTTG  | Δ1  | 6.5 (65)              |
|                          | AAACTCCACCCATGGGTTGGCCAGCCTTGCCTTGA--AATAGCCTTGACAAGGCAAACCTTG  | Δ2  | 3.9 (39)              |
|                          | AAACTCCACCCATGGGTTGGCCAGCCTTGCCTTG---AATAGCCTTGACAAGGCAAACCTTG  | Δ3  | 3.9 (39)              |
|                          | AAACTCCACCCATGGGTTGGCCAGCCTTGCCTTG----ATAGCCTTGACAAGGCAAACCTTG  | Δ4  | 2.2 (22)              |
|                          | AAACTCCACCCATGGGTTGGCC-----AGCCTTGACAAGGCAAACCTTG               | Δ18 | 1.5 (15)              |
|                          | AACCTCCACCCATGGGTTGGCCAGCCTTGCCTTGACCCAATAGCCTTGACAAGGCAAACCTTG | +1  | 1.3 (13)              |
|                          | AACCTCCACCCATGGGTTGGCCAGCCTTGCCTTGAACCAATAGCCTTGACAAGGCAAACCTTG | +1  | 1.3 (13)              |
|                          | AAACTCCACCCATGGGTTGGCCAG-----CCAATAGCCTTGACAAGGCAAACCTTG        | Δ11 | 1.2 (12)              |
| Reference                | AAACTCCACCCATGGGTTGGCCAGCCTTGCCTTGACCAATAGCCTTGACAAGGCAAACCTTG  |     | % Allele (Read count) |
| BM CD34 <sup>+</sup> 17w | AAACTCCACCCATGGGTTGGCCAGCCTTGCCTTGACCAATAGCCTTGACAAGGCAAACCTTG  | 0   | 35.9 (401)            |
| Mouse 1                  | AAACTCCACCCATGGGTTGGCCAGCCTT-----GCCTTGACAAGGCAAACCTTG          | Δ13 | 34.7 (387)            |
|                          | AAACTCCACCCATGGGTTGGCCAGCCTTGCCTTGA-CAATAGCCTTGACAAGGCAAACCTTG  | Δ1  | 7.6 (85)              |
|                          | AAACTCCACCCATGGGTTGGCCAGCCTTGCCTTG---ATAGCCTTGACAAGGCAAACCTTG   | Δ4  | 2.8 (31)              |
|                          | CCATGGGTTGGCCAGCCTTGCCTTGACAATATTGGCCAATAGCCTTGACAAGGCAAACCTTG  | +9  | 2.2 (24)              |
|                          | AAACTCCACCCATGGGTTGGCCAGCCTTGCCTTGA-----CCTTGACAAGGCAAACCTTG    | Δ7  | 2.0 (22)              |
|                          | AACCTCCACCCATGGGTTGGCCAGCCTTGCCTTGACCCAATAGCCTTGACAAGGCAAACCTTG | +1  | 1.8 (20)              |
|                          | AAACTCCACCCATGGGTTGGCCAGCCTTG-----AAACTTG                       | Δ25 | 1.6 (18)              |
|                          | AAACTCCACCCATGGGTTGGCCAGCCTTGCCTTGA--AATAGCCTTGACAAGGCAAACCTTG  | Δ2  | 1.5 (17)              |
|                          | TCCACCCATGGGTTGGCCAGCCTTGCCTTGACAAGGCAATAGCCTTGACAAGGCAAACCTTG  | +4  | 1.4 (16)              |
|                          | AAACTCCACCCATGGGTTGGCCAGCCTTGCCTTG---AATAGCCTTGACAAGGCAAACCTTG  | Δ3  | 1.3 (15)              |

### Supplemental Figure 3. Similar indel distributions before and after transplantation

Normal donor #1 CD34<sup>+</sup> cells were edited with Cas9 + sgRNA-1 RNP, using the Neon Transfection System. The top panel shows small on-target indels determined by NGS after culture for 4 days. The bottom panel shows indels in donor CD34<sup>+</sup> cells purified from the bone marrow of recipient NBSGW mice at 17 weeks after transplantation. Sequence alignments show edited region of *HBG1* and *HBG2*. The reference sgRNA-1 sequence is underlined and in bold, the PAM sequence is shown in red, and the BCL11A binding site is shown and shaded in blue. Deletions are represented by dashes. The percentage of each mutation is shown on the right, with the read counts by NGS in parentheses.

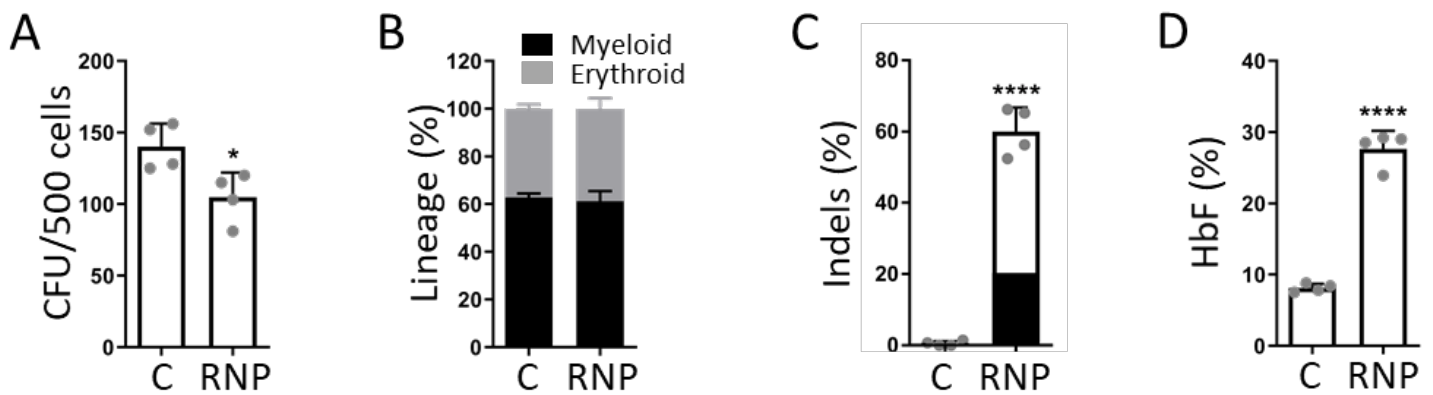

**Supplemental Figure 4. Myeloid and erythroid colonies generated from normal donor HSPCs edited with Cas9:sgRNA-1 RNP, using the Neon Transfection System.**

**A.** Five hundred HPSCs were plated in methylcellulose cultures with myeloid and erythroid cytokines. Colonies (CFU) were counted 15 days after plating control (C) (= Cas9 only) or edited (RNP) HSPCs. **B.** Relative frequencies of myeloid and erythroid colonies. **C.** Indels determined by NGS in pooled colonies. **D.** HbF expression in pooled colonies. Gray dots represent 4 technical replicates performed in a single experiment.

A

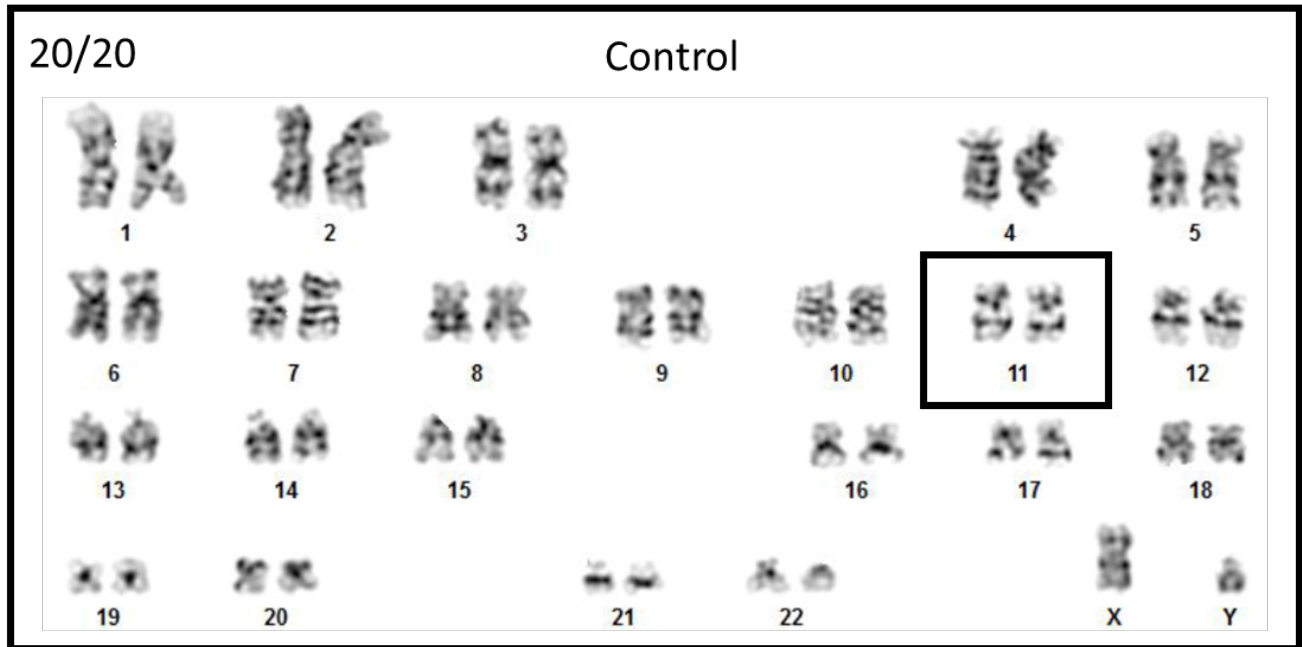

B

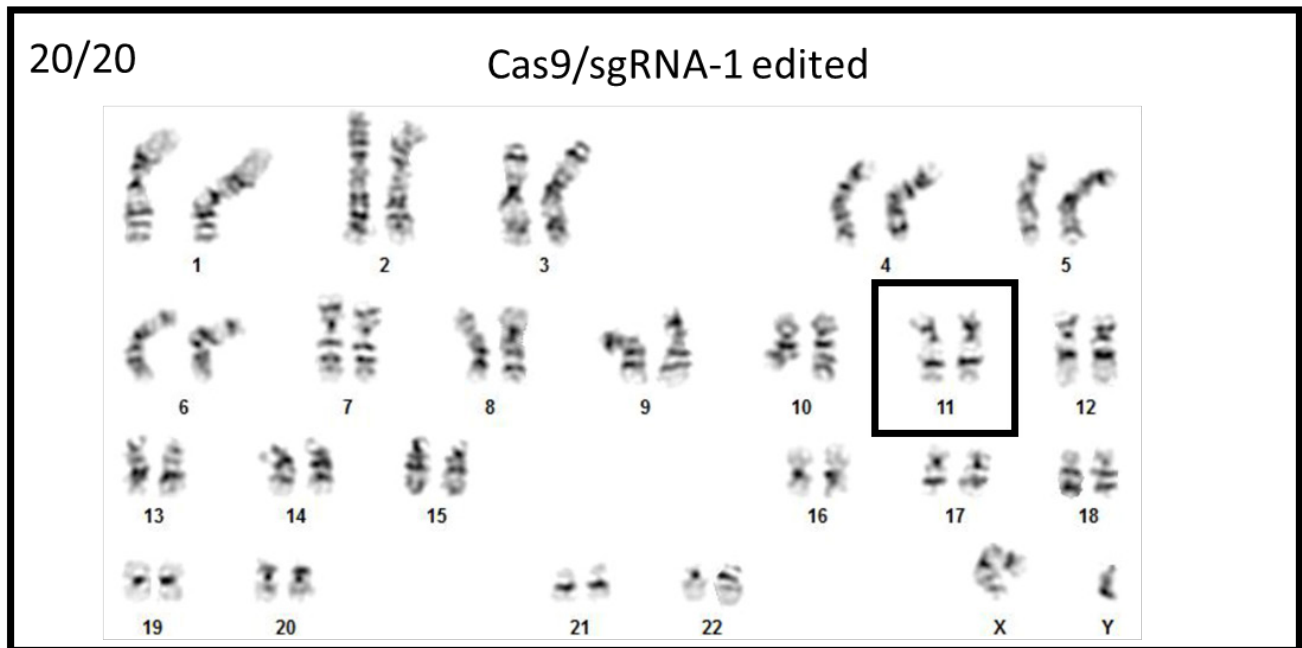**Supplemental Figure 5. G-banded karyotypes of gene-edited human cells after xenotransplantation.**

Human CD34<sup>+</sup> cells edited with Cas9:sgRNA-1 RNP, using the Neon Transfection System, or control unedited CD34<sup>+</sup> cells were transplanted into NBSGW mice. At 17 weeks after transplantation, human CD235a<sup>-</sup> cells were purified by immunomagnetic bead selection and karyotyped by G-banding. No chromosomal abnormalities were detected in 20 metaphase cells derived from control (A) or gene-edited (B) erythroblast populations. The frequency of on-target indels in the human donor population was 35%.



A

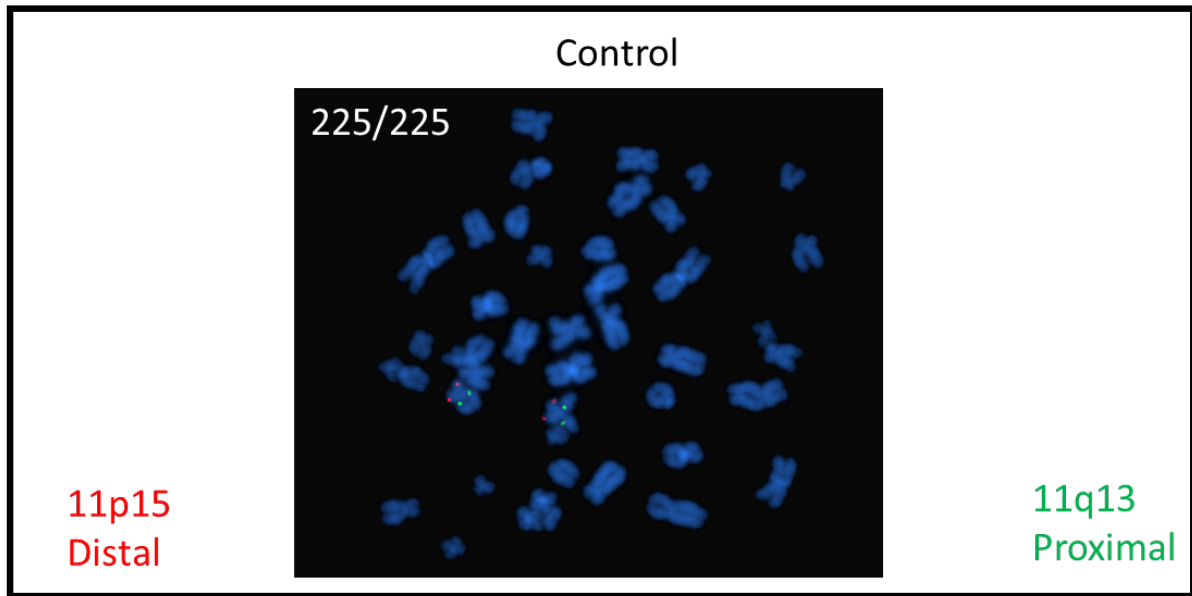

B

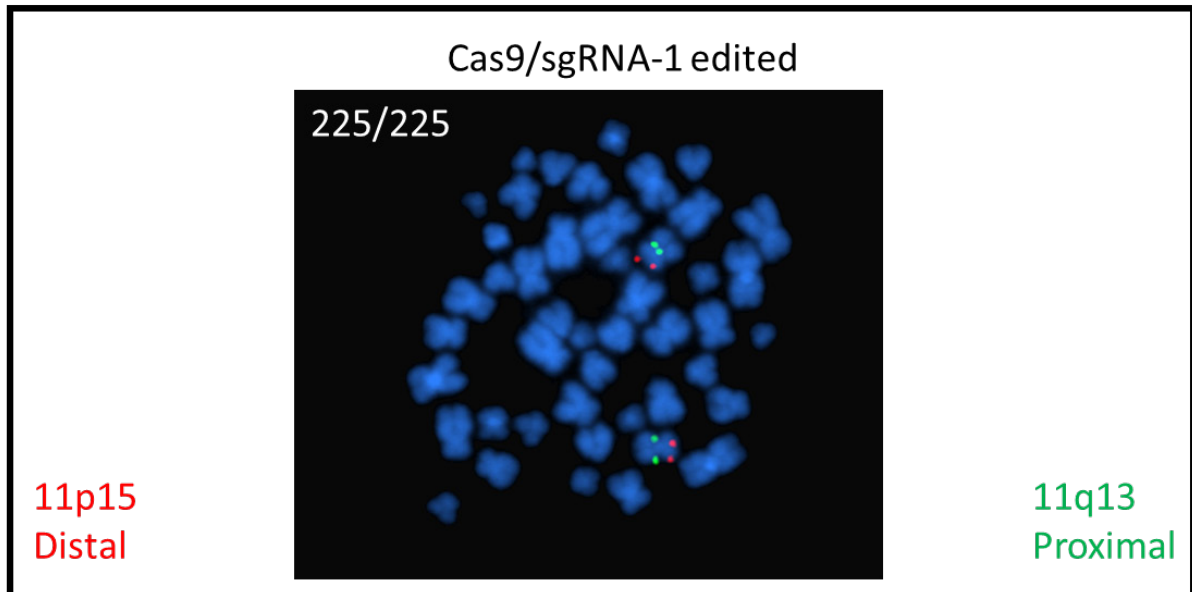**Supplemental Figure 6. Metaphase FISH from gene-edited human cells after xenotransplantation.**

Human CD34<sup>+</sup> cells edited with Cas9:sgRNA-1 RNP, using the Neon Transfection System, or control unedited CD34<sup>+</sup> cells were transplanted into NBSGW mice. At 17 weeks after transplantation, human CD235a<sup>-</sup> erythroblasts were purified by immunomagnetic bead selection and metaphase fluorescence in situ hybridization (FISH) analysis was performed. The distal portion of chromosome 11 (telomeric to cut-site; 11p15) was labeled with a red-dUTP (Alexa Fluor 594) and a chromosome 11 control (centromeric to cut-site; 11q13) was labeled with a green-dUTP (Alexa Fluor 488). A total of 225 metaphase cells were counted from the control (A) or gene-edited (B) erythroblast populations. No translocations or truncations of chromosome 11 were detected in either group. The frequency of on-target indels in the human donor population was 35%.

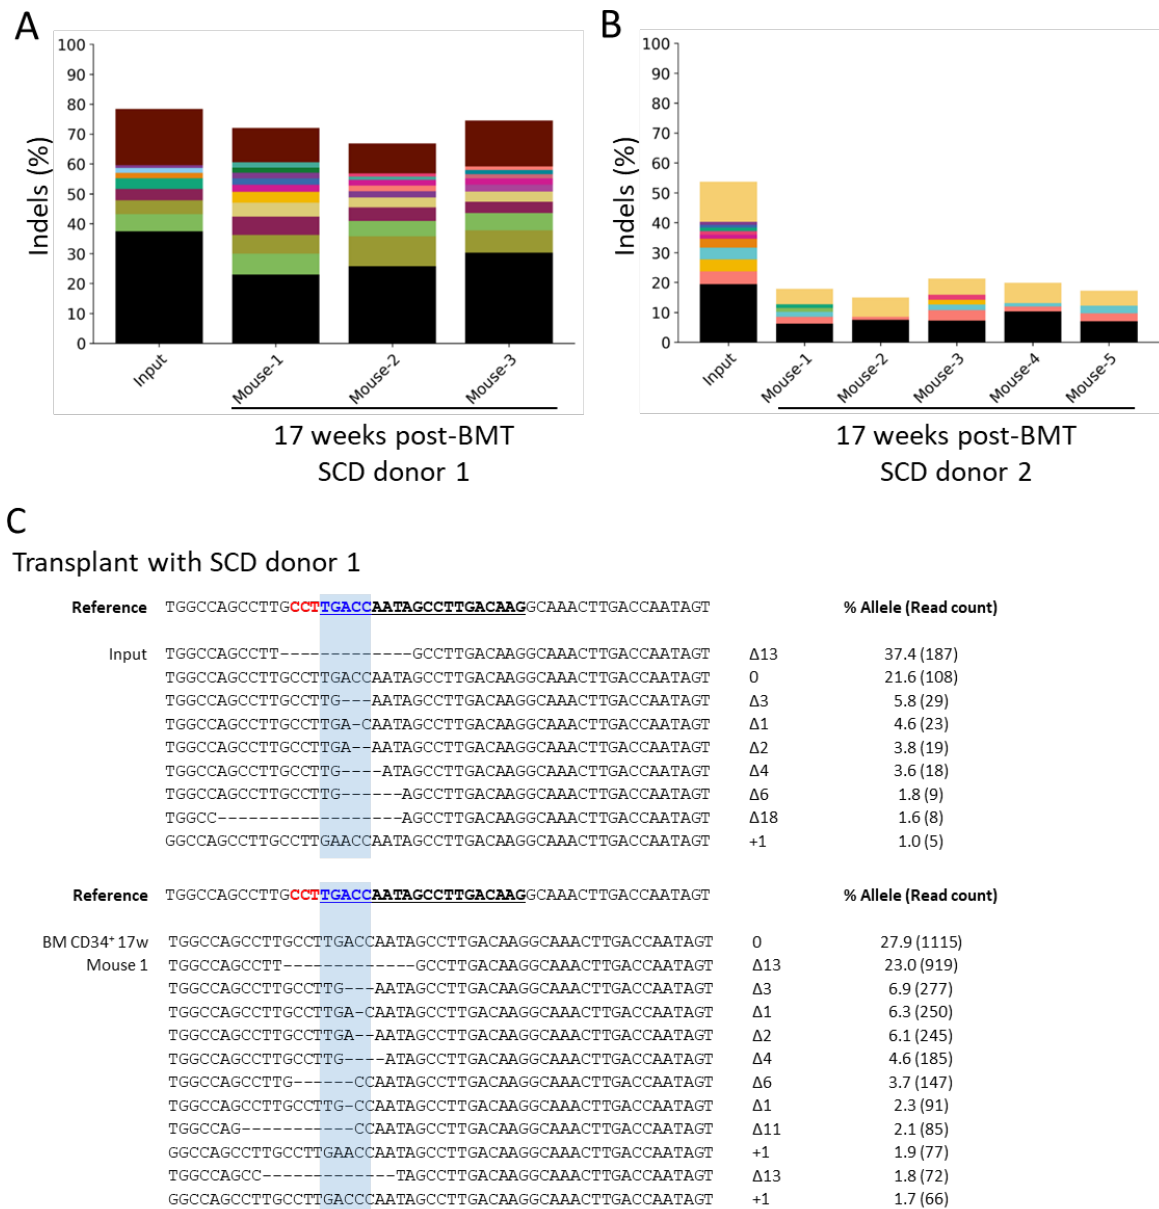

### Supplemental Figure 7. Distributions of on-target $\gamma$ -globin gene promoter indels before and after xenotransplantation.

Plerixafor-mobilized CD34<sup>+</sup> cells from 2 patients with SCD were edited with Cas9:sgRNA-1 RNP, using the Neon Transfection System, and transplanted into NBSGW mice. On-target indels at the  $\gamma$ -globin gene promoter were measured by NGS at 3 days after editing (input) and in donor-derived CD34<sup>+</sup> cells isolated from recipient bone marrow at 16 weeks after transplantation. The bar charts show high-frequency indels in cells derived from SCD donor #1 (A) and SCD donor #2 (B). The height of each bar represents the indel frequency. Each indel is represented by a different color. The 13-nt HPFH deletion is represented in black. The remaining indels with frequencies below 1% are grouped and represented at the top of each bar in burgundy (A) or yellow (B). C. Sequence alignments showing the most common on-target indels determined by NGS of edited CD34<sup>+</sup> cells from SCD donor #1. The reference sgRNA-1 sequence is underlined and in bold, the PAM sequence is shown in red, and the BCL11A binding site is shown and shaded in blue. Deletions are represented by dashes. The percentage of each mutation is shown on the right, with the NGS read counts in parentheses. See also main Figure 6.

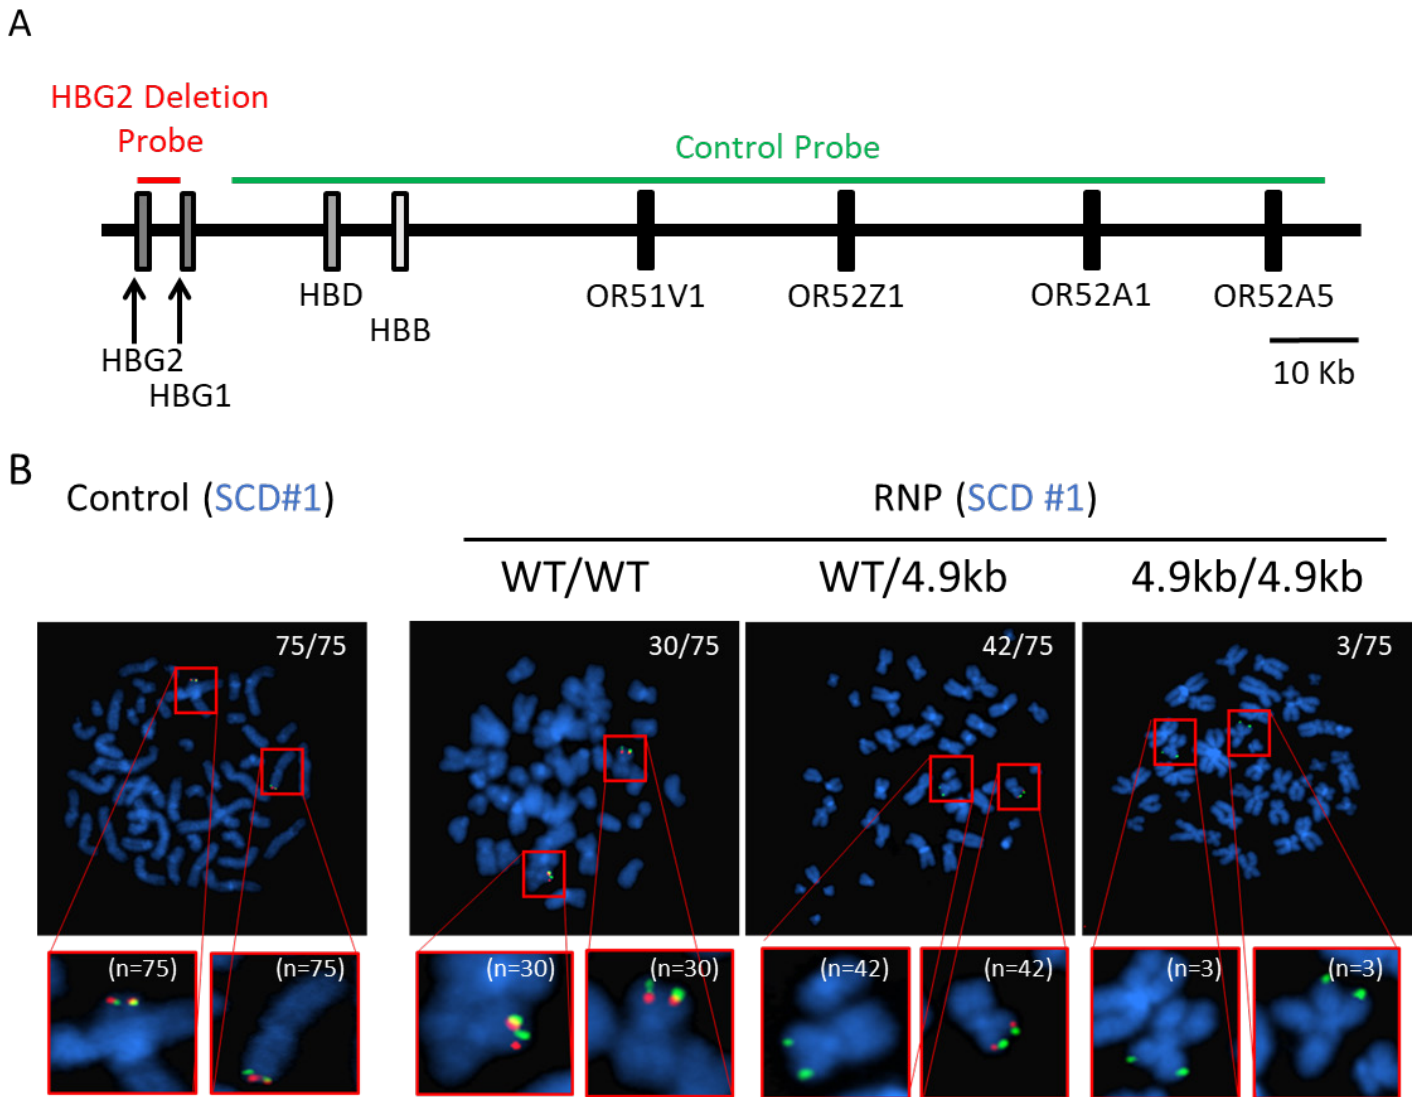

**Supplemental Figure 8. Quantification of the 4.9-kb *HBG2-HBG1* intergenic deletion by fluorescence *in situ* hybridization (FISH).**

CD34<sup>+</sup> cells from SCD donor #1 were edited with Cas9:sgRNA-1 RNP, using the Neon Transfection System, and transplanted into NBSGW mice. After 16 weeks, human donor CD34<sup>+</sup> cells were purified from recipient bone marrow, grown in culture under erythroid differentiation conditions for 14 days, and analyzed by FISH. **A.** Map of the region showing nearby genes and FISH probes used to detect the 4.9 kb-deleted segment and the adjacent region. The arrows indicate Cas9:sgRNA-1 cleavage sites. **B.** Metaphase FISH analysis. The *HBG2-HBG1* intergenic region lost in the 4.9-kb deletion is marked by the red probe, and the adjacent control region is marked in green. The deletion was absent in 75 control (non-edited) cells shown in the leftmost panel. Among 75 RNP-edited cells (in the other 3 panels), 30 had no 4.9-kb deletion (wt/wt), 42 were heterozygous (wt/4.9kb), and 3 were homozygous (4.9kb/4.9kb).

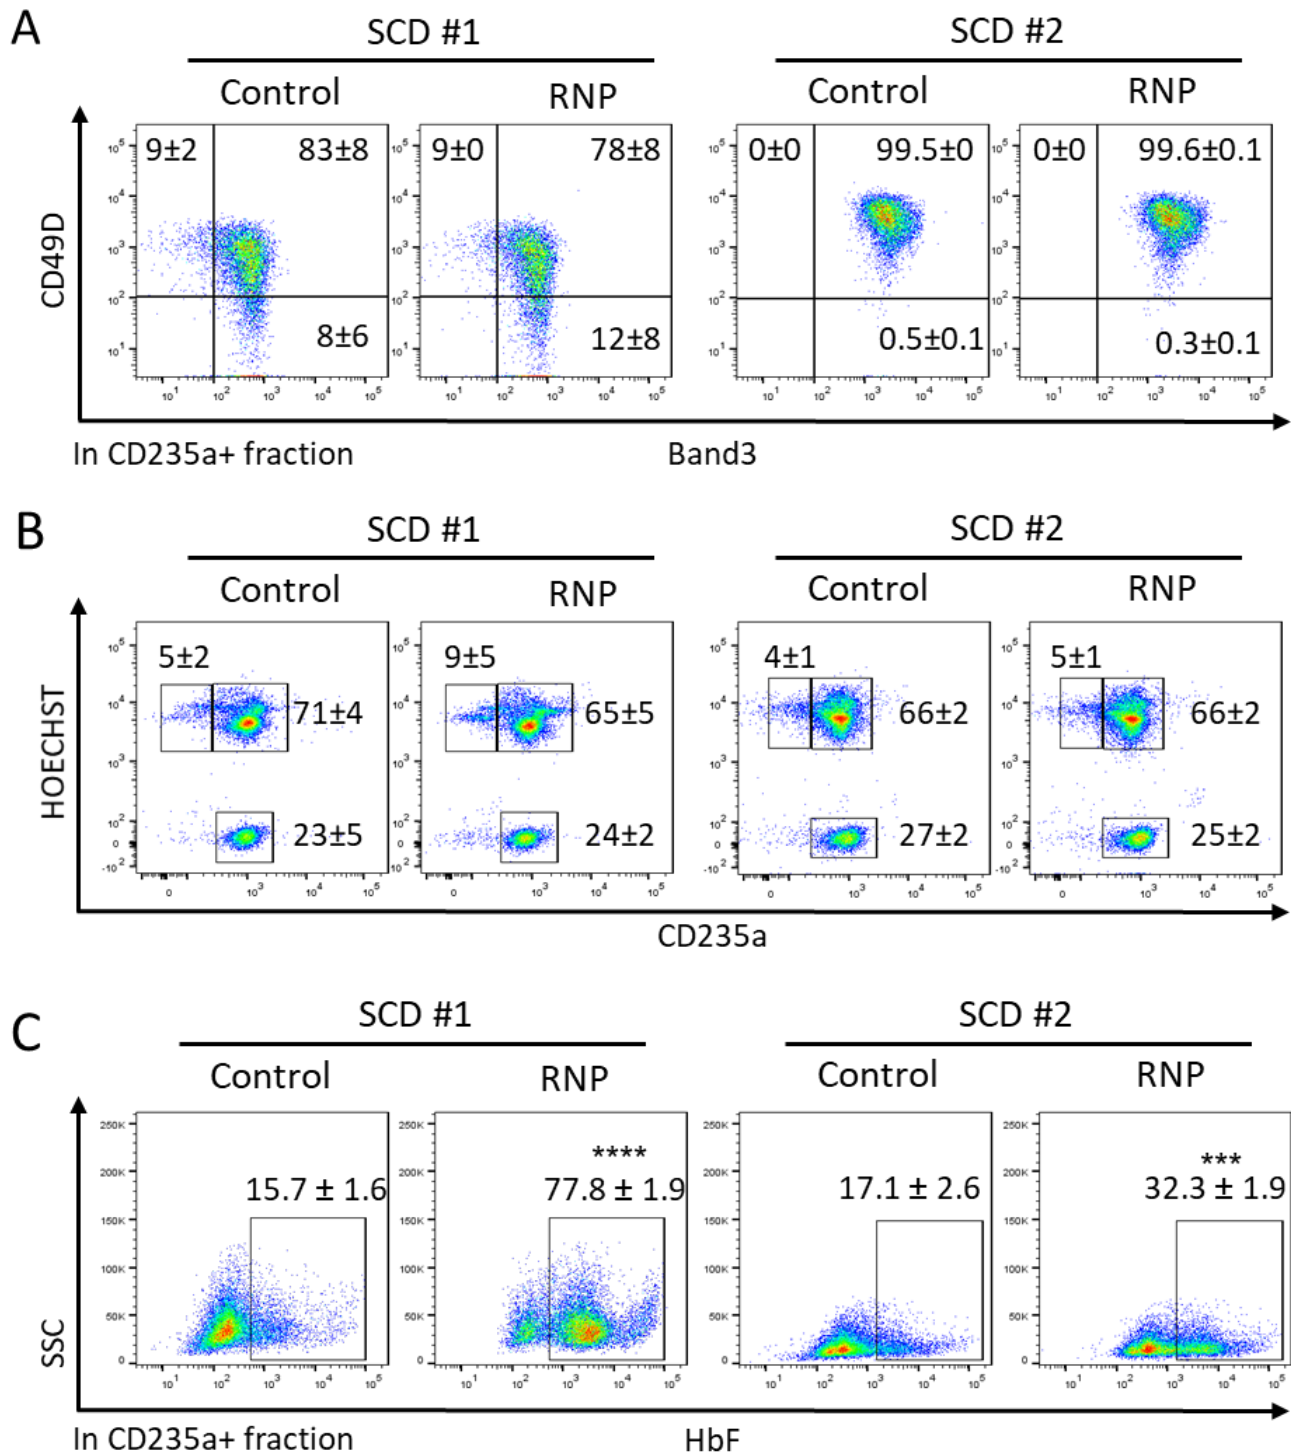

**Supplemental Figure 9. Xenotransplantation of SCD-CD34<sup>+</sup> cells into immunocompromised NBSGW mice.** **A.** Erythroid maturation was measured by flow cytometry on the human CD235a<sup>+</sup> fraction with antibodies against Band3 (a marker of differentiation) and CD49d (a marker of erythroid blasts). **B.** Enucleation was monitored using Hoechst stain (nuclear dye) and CD235a<sup>+</sup>. **C.** Representative scatter plot for F-cells determined by flow cytometry for the control and RNP groups. Unpaired t-tests were performed for statistical analysis; \*\*\*\* indicates a P-value of <0.0001.

## Supplemental References

1. Hendel, A. *et al.* Chemically modified guide RNAs enhance CRISPR-Cas genome editing in human primary cells. *Nature Biotechnology* **33**, 985–989 (2015).
2. Traxler, E. A. *et al.* A genome-editing strategy to treat  $\beta$ -hemoglobinopathies that recapitulates a mutation associated with a benign genetic condition. *Nature Medicine* **22**, 987–990 (2016).
3. Connelly, J. P. & Pruett-Miller, S. M. CRIS.py: A Versatile and High-throughput Analysis Program for CRISPR-based Genome Editing. *Sci Rep-uk* **9**, 4194 (2019).
4. Hu, J. *et al.* Isolation and functional characterization of human erythroblasts at distinct stages: implications for understanding of normal and disordered erythropoiesis in vivo. *Blood* **121**, 3246–3253 (2013).
5. Lazzarotto, C. R. *et al.* Defining CRISPR–Cas9 genome-wide nuclease activities with CIRCLE-seq. *Nature Protocols* **1** (2018). doi:10.1038/s41596-018-0055-0
6. Untergasser, A. *et al.* Primer3—new capabilities and interfaces. *Nucleic Acids Res* **40**, e115–e115 (2012).
7. Pinello L, Canver MC, Hoban MD, et al. Analyzing CRISPR genome-editing experiments with CRISPResso. *Nat Biotechnol.* 2016;34, (7):695–697.
8. Brinkman EK, Chen T, Amendola M, van Steensel B. Easy quantitative assessment of genome editing by sequence trace decomposition. *Nucleic Acids Res* . 2014;42:e168–e168.
